# Supplementary material for: Kidney Measurement and Glomerular Filtration Rate Evolution in Children With Polycystic Kidney Disease
Source: Preprints.org preprint supplement (doi:10.20944/preprints202404.1749.v1), 2024-04-28
Supplement: Supplementary file 3 [file supplementary]

**Supplemental table 1.** Glomerular filtration rates in all children from the initial evaluation until the 1-year follow-up.

| Age | Brion eGFR | Schwartz eGFR | Quadratic eGFR | Follow-up Schwartz eGFR | Follow-up Quadratic eGFR | PKD mutation |
| --- | --- | --- | --- | --- | --- | --- |
| 0.08 | 46.20314279 | - | - | 152.8060841 | 121.6342567 | PKD1 |
| 0.5 | 69.09018036 | - | - | 136.0218171 | 117.5222531 | PKD1 |
| 2 | - | 143.782977 | 120.4903275 | 178.2517226 | 123.5248596 | - |
| 3 | - | 162.8206727 | 124.1637745 | N/A | N/A | PKD2 |
| 5 | - | 136.3488321 | 115.4855086 | 149.5052984 | 119.5878744 | - |
| 7 | - | 160.2625648 | 125.8456194 | 160.9295409 | 121.760026 | PKD1 |
| 8 | - | 135.8253194 | 116.7218252 | 113.8954732 | 106.8699015 | PKD1 |
| 9 | - | 133.8804325 | 120.6295089 | 153.6194308 | 125.9122352 | PKD1 |
| 9 | - | 105.1544704 | 106.0002908 | N/A | N/A | PKD1 |
| 12 | - | 195.5394414 | 125.536702 | N/A | N/A | PKD2 |
| 12 | - | 115.2070761 | 109.3185317 | 114.1974314 | 108.8859442 | PKD2 |
| 15 | - | 100.4387047 | 105.6900692 | N/A | N/A | - |
| 15 | - | 76.92247672 | 86.49234885 | N/A | N/A | PKD2 |
| 16 | - | 79.12699184 | 89.00341578 | N/A | N/A | PKD2 |
| 16 | - | 115.3778217 | 115.4869372 | N/A | N/A | PKD2 |
| 16 | - | 107.2655515 | 106.5189492 | N/A | N/A | - |

Legend: Age in years; eGFR=estimated glomerular filtration measured in ml/min/1.73m2; N/A=not assigned.
